# Supplementary material for: Plasma Thermogram Parameters Differentiate Status and Overall Survival of Melanoma Patients
Source: MDPI journal article supplement (doi:10.3390/curroncol30070453), 2023-06-24
Supplement: s1 [file s1]

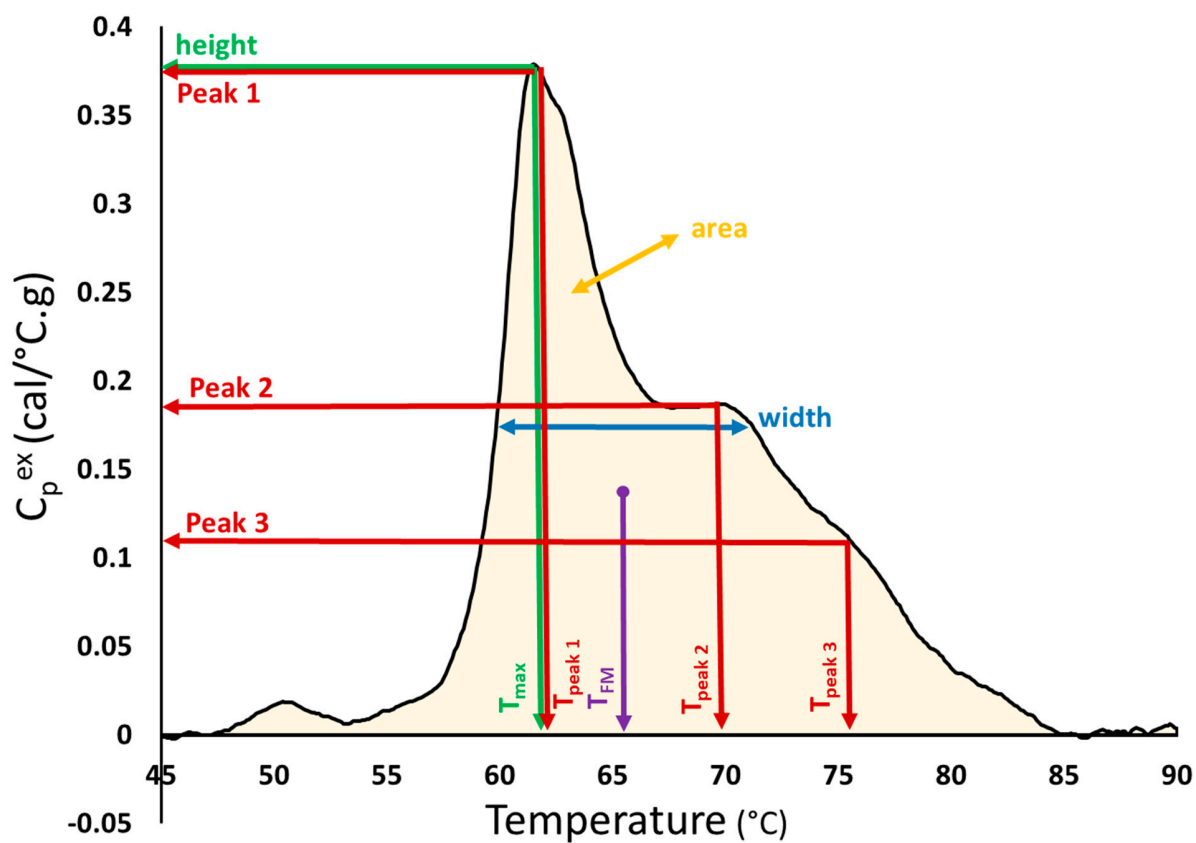

**Figure S1.** Selected thermogram features evaluated in the study: thermogram peak width at half height (Width); total area under the thermogram (Area), maximum peak height (Max), temperature of the peak maximum ( $T_{\text{max}}$ ), first moment temperature ( $T_{\text{FM}}$ ), maximum excess specific heat capacity ( $C_p^{\text{ex}}$ ) of Peaks 1, 2, and 3 (Peak 1, Peak 2, and Peak 3, respectively) and the position of Peaks 1, 2, and 3 ( $T_{\text{peak 1}}$ ,  $T_{\text{peak 2}}$ , and  $T_{\text{peak 3}}$ , respectively).
