# Supplementary material for: Plasma Thermogram Parameters Differentiate Status and Overall Survival of Melanoma Patients
Source: MDPI journal article supplement (doi:10.3390/curroncol30070453), 2023-06-24
Supplement: s1 [file s1]

**Table S2.** Summary of analysis evaluating linear models estimating changes in thermogram parameters based on clinical status with sex covariates.

| Parameter                                                | Unadjusted p-value | FDR adjusted p-value |
|----------------------------------------------------------|--------------------|----------------------|
| <b>Models with a significant sex-status interaction</b>  |                    |                      |
| Width                                                    | 0.187              | 0.239                |
| Peak 2                                                   | <0.001             | <0.001               |
| T <sub>Peak 1</sub>                                      | 0.008              | 0.022                |
| T <sub>Peak 2</sub>                                      | <0.001             | <0.001               |
| V1.2                                                     | <0.001             | <0.001               |
| T <sub>V1.2</sub>                                        | 0.020              | 0.047                |
| Peak 1/2                                                 | 0.085              | 0.150                |
| Peak 1/3                                                 | 0.209              | 0.240                |
| V1.2/Peak 1                                              | 0.062              | 0.119                |
| PC2                                                      | <0.001             | <0.001               |
| <b>Models with no significant sex-status interaction</b> |                    |                      |
| Area                                                     | <0.001             | <0.001               |
| Max                                                      | 0.155              | 0.222                |
| Peak 1                                                   | 0.172              | 0.233                |
| Peak 3                                                   | 0.050              | 0.103                |
| T <sub>Max</sub>                                         | 0.124              | 0.204                |
| T <sub>FM</sub>                                          | 0.350              | 0.383                |
| Peak 2/3                                                 | 0.889              | 0.928                |
| V1.2/Peak 2                                              | 0.205              | 0.241                |
| V1.2/Peak 3                                              | 0.973              | 0.973                |
| Median                                                   | <0.001             | <0.001               |
| PC1                                                      | 0.152              | 0.222                |
| PC3                                                      | <0.001             | <0.001               |
| PC4                                                      | 0.006              | 0.016                |
