# Supplementary material for: Plasma Thermogram Parameters Differentiate Status and Overall Survival of Melanoma Patients
Source: MDPI journal article supplement (doi:10.3390/curroncol30070453), 2023-06-24
Supplement: s1 [file s1]

**Table S5.** Summary of univariate Cox proportional hazards regression analysis of NED patient progression-free survival.

| <b>Parameter</b>    | <b>Unadjusted p-value</b> | <b>FDR adjusted p-value</b> |
|---------------------|---------------------------|-----------------------------|
| Age                 | 0.714                     | 0.796                       |
| Gender              | 0.716                     | 0.796                       |
| Area                | 0.519                     | 0.796                       |
| Width               | 0.652                     | 0.796                       |
| Max                 | 0.570                     | 0.796                       |
| Peak 1              | 0.473                     | 0.796                       |
| Peak 2              | 0.268                     | 0.796                       |
| Peak 3              | 0.567                     | 0.796                       |
| T <sub>Peak 1</sub> | 0.983                     | 0.983                       |
| T <sub>Peak 2</sub> | 0.732                     | 0.796                       |
| V1.2                | 0.672                     | 0.796                       |
| T <sub>V1.2</sub>   | 0.099                     | 0.796                       |
| T <sub>Max</sub>    | 0.106                     | 0.796                       |
| T <sub>FM</sub>     | 0.422                     | 0.796                       |
| Peak 1/2            | 0.287                     | 0.796                       |
| Peak 1/3            | 0.397                     | 0.796                       |
| Peak 2/3            | 0.948                     | 0.983                       |
| V1.2/Peak 1         | 0.267                     | 0.796                       |
| V1.2/Peak 2         | 0.527                     | 0.796                       |
| V1.2/Peak 3         | 0.653                     | 0.796                       |
| Median              | 0.182                     | 0.796                       |
| PC1                 | 0.220                     | 0.796                       |
| PC2                 | 0.344                     | 0.796                       |
| PC3                 | 0.516                     | 0.796                       |
| PC4                 | 0.492                     | 0.796                       |
