# Supplementary material for: Plasma Thermogram Parameters Differentiate Status and Overall Survival of Melanoma Patients
Source: MDPI journal article supplement (doi:10.3390/curroncol30070453), 2023-06-24
Supplement: s1 [file s1]

**Table S4.** Summary of univariate Cox proportional hazards regression analysis of active melanoma patient overall survival.

| <b>Parameter</b> | <b>Unadjusted p-value</b> | <b>FDR adjusted p-value</b> |
|------------------|---------------------------|-----------------------------|
| Age              | 0.393                     | 0.702                       |
| Sex              | 0.056                     | 0.273                       |
| Area             | 0.793                     | 0.881                       |
| Width            | 0.799                     | 0.881                       |
| Max              | 0.830                     | 0.881                       |
| Peak 1           | 0.339                     | 0.653                       |
| Peak 2           | 0.789                     | 0.881                       |
| Peak 3           | 0.066                     | 0.273                       |
| TPeak 1          | 0.135                     | 0.374                       |
| TPeak 2          | 0.579                     | 0.852                       |
| V1.2             | 0.112                     | 0.351                       |
| TV1.2            | 0.272                     | 0.619                       |
| TMax             | 0.782                     | 0.881                       |
| TFM              | 0.191                     | 0.477                       |
| Peak 1/2         | 0.843                     | 0.881                       |
| Peak 1/3         | 0.431                     | 0.719                       |
| Peak 2/3         | 0.028                     | 0.178                       |
| V1.2/Peak 1      | 0.846                     | 0.881                       |
| V1.2/Peak 2      | 0.016                     | 0.130                       |
| V1.2/Peak 3      | 0.013                     | 0.130                       |
| Median           | 0.077                     | 0.274                       |
| PC1              | 0.522                     | 0.815                       |
| PC2              | 0.297                     | 0.619                       |
| PC3              | 0.007                     | 0.130                       |
| PC4              | 0.881                     | 0.881                       |
