# Supplementary material for: Plasma Thermogram Parameters Differentiate Status and Overall Survival of Melanoma Patients
Source: MDPI journal article supplement (doi:10.3390/curroncol30070453), 2023-06-24
Supplement: s1 [file s1]

**Table S3.** Summary of analysis evaluating the association between thermogram parameters and cancer location, the number of affected organs/tissues, and clinical stage with gender as a covariate.

| Parameter                                                 | Cancer location    |                      | Number of affected organs/tissues |                      | Clinical stage     |                      |
|-----------------------------------------------------------|--------------------|----------------------|-----------------------------------|----------------------|--------------------|----------------------|
|                                                           | Unadjusted p-value | FDR adjusted p-value | Unadjusted p-value                | FDR adjusted p-value | Unadjusted p-value | FDR adjusted p-value |
| <b>Models with a significant sex-status interaction</b>   |                    |                      |                                   |                      |                    |                      |
| T <sub>Peak 2</sub>                                       | 0.936              | 0.971                |                                   |                      |                    |                      |
| Peak 2/3                                                  |                    |                      | 0.207                             | 0.436                |                    |                      |
| V1.2/Peak 2                                               |                    |                      | 0.299                             | 0.484                |                    |                      |
| V1.2/Peak 3                                               |                    |                      | 0.316                             | 0.484                |                    |                      |
| PC1                                                       | 0.166              | 0.686                |                                   |                      |                    |                      |
| PC2                                                       |                    |                      | 0.195                             | 0.436                |                    |                      |
| <b>Models with no significant sex-status interactions</b> |                    |                      |                                   |                      |                    |                      |
| Area                                                      | 0.173              | 0.686                | 0.482                             | 0.693                | 0.413              | 0.980                |
| Width                                                     | 0.812              | 0.929                | 0.866                             | 0.906                | 0.737              | 0.980                |
| Max                                                       | 0.083              | 0.686                | 0.084                             | 0.436                | 0.316              | 0.980                |
| Peak 1                                                    | 0.179              | 0.686                | 0.097                             | 0.436                | 0.686              | 0.980                |
| Peak 2                                                    | 0.848              | 0.929                | 0.308                             | 0.484                | 0.937              | 0.980                |
| Peak 3                                                    | 0.676              | 0.913                | 0.559                             | 0.727                | 0.515              | 0.980                |
| T <sub>Peak 1</sub>                                       | 0.646              | 0.913                | 0.601                             | 0.727                | 0.544              | 0.980                |
| T <sub>Peak 2</sub>                                       |                    |                      | 1.000                             | 1.000                | 1.000              | 1.000                |
| V1.2                                                      | 0.672              | 0.913                | 0.608                             | 0.727                | 0.672              | 0.980                |
| T <sub>V1.2</sub>                                         | 0.136              | 0.686                | 0.140                             | 0.436                | 0.252              | 0.980                |
| T <sub>Max</sub>                                          | 0.971              | 0.971                | 0.288                             | 0.484                | 0.656              | 0.980                |
| T <sub>FM</sub>                                           | 0.491              | 0.913                | 0.102                             | 0.436                | 0.831              | 0.980                |
| Peak 1/2                                                  | 0.150              | 0.686                | 0.061                             | 0.436                | 0.578              | 0.980                |
| Peak 1/3                                                  | 0.224              | 0.736                | 0.161                             | 0.436                | 0.804              | 0.980                |

|             |       |       |       |       |       |       |
|-------------|-------|-------|-------|-------|-------|-------|
| Peak 2/3    | 0.576 | 0.913 |       |       | 0.385 | 0.980 |
| V1.2/Peak 1 | 0.342 | 0.686 | 0.179 | 0.436 | 0.834 | 0.980 |
| V1.2/Peak 2 | 0.605 | 0.913 |       |       | 0.065 | 0.980 |
| V1.2/Peak 3 | 0.742 | 0.913 |       |       | 0.432 | 0.980 |
| Median      | 0.487 | 0.913 | 0.691 | 0.757 | 0.806 | 0.980 |
| PC1         |       |       | 0.119 | 0.436 | 0.674 | 0.980 |
| PC2         | 0.719 | 0.913 |       |       | 0.883 | 0.980 |
| PC3         | 0.162 | 0.683 | 0.632 | 0.727 | 0.237 | 0.980 |
| PC4         | 0.754 | 0.913 | 0.208 | 0.436 | 0.906 | 0.980 |

---
