# Supplementary material for: Plasma Thermogram Parameters Differentiate Status and Overall Survival of Melanoma Patients
Source: Curr Oncol. 2023 Jun 24;30(7):6079–96. doi: 10.3390/curroncol30070453 (PMC10378067; doi:10.3390/curroncol30070453)
Supplement: Supplementary file 1 [file curroncol-30-00453-s001.zip]

Archive with 8 entries (8 files):
- curroncol-2327094 - Figure S1.pdf
- curroncol-2327094 - Figure S2.pdf
- curroncol-2327094 - Figure S3.pdf
- curroncol-2327094 - Table S1.xlsx
- curroncol-2327094 - Table S2.pdf
- curroncol-2327094 - Table S3.pdf
- curroncol-2327094 - Table S4.pdf
- curroncol-2327094 - Table S5.pdf
